# Supplementary material for: Gastrointestinal tolerance of d-allulose in children: an acute, randomised, double-blind, placebo-controlled, cross-over study
Source: Royal Society of Chemistry journal article supplement (doi:10.1039/d3fo04210c), 2023-12-14
Supplement: d3fo04210c1.pdf [file d3fo04210c1.pdf]

**Supplementary Table 1.** Lunch Option Composition.

| Option 1                      | Option 2                      |
|-------------------------------|-------------------------------|
| White bread (2 slices) – 72 g | White bread (2 slices) – 72 g |
| Butter – 10 g                 | Butter – 10 g                 |
| Ham (1 slice) – 30 g          | Chicken (1 slice) – 30 g      |
| Cheddar cheese – 30 g         | Cheddar cheese – 30 g         |
| Energy – 345 kcal             | Energy – 347 kcal             |
| Carbohydrate – 33.5 g         | Carbohydrate – 33.8 g         |
| Protein – 16.2 g              | Protein – 17.7 g              |
| Fat – 17.1 g                  | Fat – 16.5 g                  |
| Fibre – 1.3 g                 | Fibre – 1.3 g                 |

**Supplementary Table 2.** Drink specifications.

|                   | Strawberry | Blackberry | Orange  |
|-------------------|------------|------------|---------|
| INGREDIENT        | %          | %          | %       |
| Sucralose         | 0.0500     | 0.0500     | 0.0500  |
| Potassium Sorbate | 0.0300     | 0.0300     | 0.0300  |
| Sodium Benzoate   | 0.0300     | 0.0300     | 0.0300  |
| Allulose 77% DS   | 47.800     | 47.800     | 47.800  |
| Citric Acid       | 0.1614     | 0.1614     | 0.1614  |
| Potassium Citrate | 0.0650     | 0.0650     | 0.0650  |
| Flavour           | 0.5000     | 0.3000     | 0.3000  |
| Water             | 943.836    | 945.836    | 945.836 |
| TOTAL             | 100        | 100        | 100     |

**Supplementary Table 3.** Distribution of weight-for-age percentiles of screened participants.

| Percentile | Treatment Sequence 1 | Treatment Sequence 2 | Treatment Sequence 3 | Total       |
|------------|----------------------|----------------------|----------------------|-------------|
| 10th       | 0 (0.0%)             | 1 (10.0%)            | 0 (0.0%)             | 1 (3.3%)    |
| 10th-25th  | 0 (0.0%)             | 1 (10.0%)            | 0 (0.0%)             | 1 (3.3%)    |
| 25-50th    | 1 (10.0%)            | 0 (0.0%)             | 0 (0.0%)             | 1 (3.3%)    |
| 25th       | 0 (0.0%)             | 0 (0.0%)             | 2 (20.0%)            | 2 (6.7%)    |
| 25th-50th  | 1 (10.0%)            | 1 (10.0%)            | 0 (0.0%)             | 2 (6.7%)    |
| 50th       | 3 (30.0%)            | 2 (20.0%)            | 1 (10.0%)            | 6 (20.0%)   |
| 50th-75th  | 1 (10.0%)            | 2 (20.0%)            | 1 (10.0%)            | 4 (13.3%)   |
| 75th       | 2 (20.0%)            | 1 (10.0%)            | 1 (10.0%)            | 4 (13.3%)   |
| 75th-85th  | 1 (10.0%)            | 0 (0.0%)             | 0 (0.0%)             | 1 (3.3%)    |
| 85th       | 0 (0.0%)             | 2 (20.0%)            | 2 (20.0%)            | 4 (13.3%)   |
| 85th-90th  | 1 (10.0%)            | 0 (0.0%)             | 3 (30.0%)            | 4 (13.3%)   |
| Total      | 10 (100.0%)          | 10 (100.0%)          | 10 (100.0%)          | 30 (100.0%) |

**Supplementary Table 4.** Changes in stool frequency and consistency.

| Scale Tolerance endpoint | Placebo |                 | Mean difference | Low Dose        |         | Mean difference | High Dose        |         |
|--------------------------|---------|-----------------|-----------------|-----------------|---------|-----------------|------------------|---------|
|                          | Mean*   | 95% CI          |                 | 95% CI          | p-value |                 | 95% CI           | p-value |
| Stool frequency          | 0.217   | (-0.003, 0.436) | -0.167          | (-0.388, 0.055) | 0.146   | -0.233          | (-0.455, -0.012) | 0.044   |
| Stool consistency        | 0.374   | (-0.285, 1.033) | 0.073           | (-0.727, 0.874) | 0.858   | 0.023           | (-0.77, 0.816)   | 0.955   |

Note: scale endpoints are change from baseline (Visit 2). Estimates are from mixed effect model with treatment arm as fixed effect and the random effects were visits within subjects.

\*mean change from baseline in number of stools

Abbreviations: CI = confidence interval

**Supplementary Table 5.** GI symptoms experienced within 24 hours post-consumption of study product by participant, intensity, relatedness, action taken and outcome.

| Participant | Description                                      | Treatment | Intensity | Related | Action taken | Outcome |
|-------------|--------------------------------------------------|-----------|-----------|---------|--------------|---------|
| 1           | Mild pain/cramps + nausea                        | Dose 1    | 1         | 3       | 1            | 1       |
|             | Moderate cramps + nausea                         | Dose 2    | 1         | 3       | 1            | 1       |
| 2           | Type 6-7 stool post product                      | Dose 1    | 1         | 3       | 1            | 1       |
| 3           | Abdominal cramps                                 | Dose 2    | 1         | 3       | 1            | 1       |
| 4           | Mild cramps before passing stool lasted 1 minute | Placebo   | 1         | 3       | 1            | 1       |
| 5           | Abdominal cramps                                 | Dose 1    | 2         | 3       | 1            | 1       |
| 6           | Mild cramps before passing stool 2 minutes       | Dose 2    | 1         | 3       | 1            | 1       |
| 7           | Mild cramps                                      | Dose 1    | 1         | 3       | 1            | 1       |

Intensity: 1 = mild, 2 = moderate

Related: 1 = unrelated to study product, 2 = unlikely related to study product, 3 = possible related to study product

Action taken: 1 = non, 3 = therapy required

Outcome: 1 = recovered/resolved
